# Supplementary material
Source: PubMed Central journal article supplement (PMC6870379)
Supplement: HBM-34-2635-s001.pdf [file HBM-34-2635-s001.pdf]

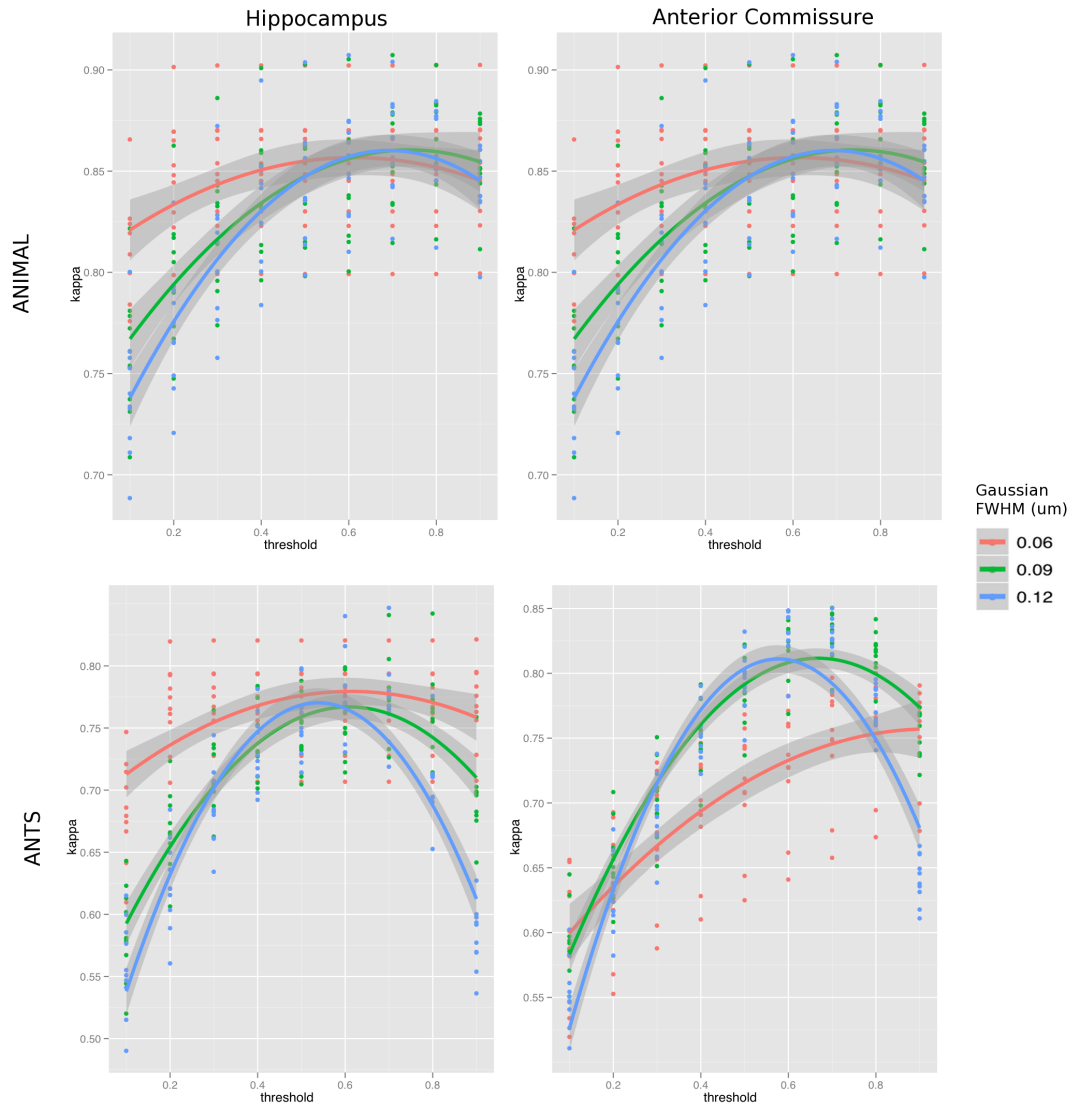

**Figure S1.** Kappas evaluated after blurring each label of hippocampus and anterior commissure (mouse data) using a varying Gaussian kernel (0.06, 0.09, and 0.12  $\mu\text{m}$ ). Overlap with the homologous gold standard was evaluated after applying a threshold of 0.1 – 0.9 (in steps of 0.1). - Not meant to be included in the manuscript

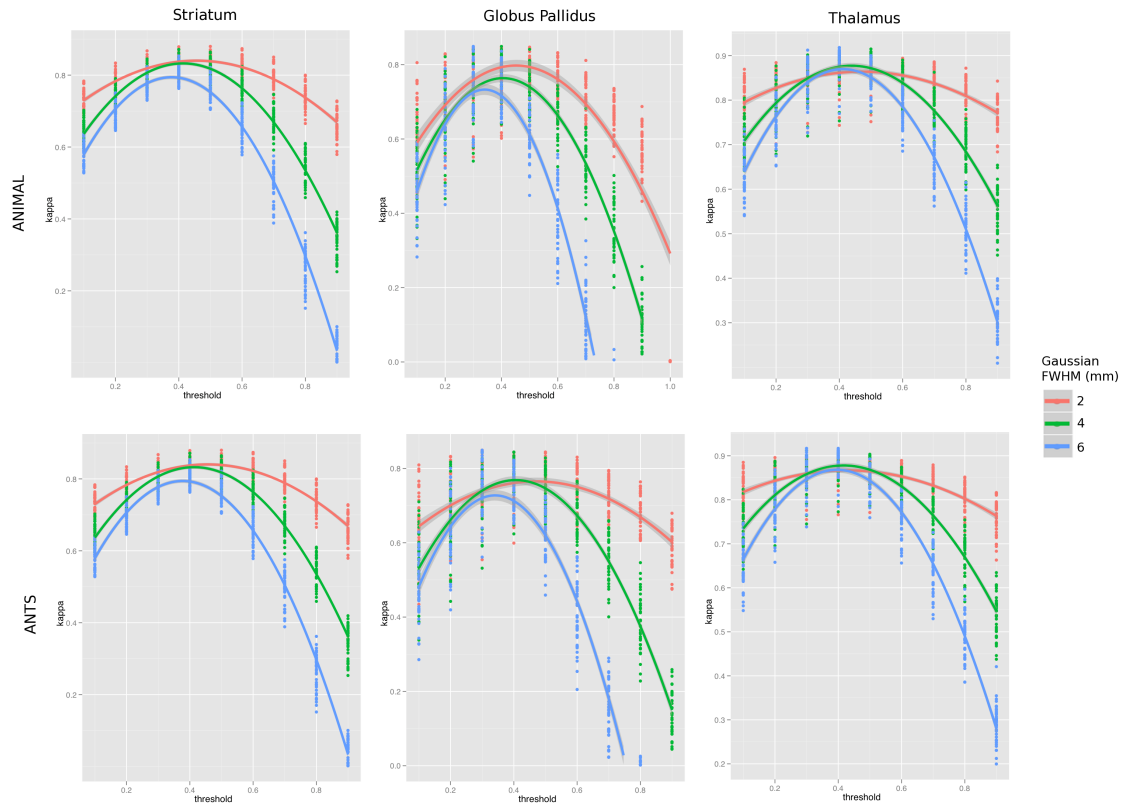

**Figure S2.** Kappas evaluated after blurring each label of the striatum, pallidum, and thalamus (human data) using a varying Gaussian kernel (2, 4, and 6 mm). Overlap with the homologous gold standard was evaluated after applying a threshold of 0.1 – 0.9 (in steps of 0.1).
